# Supplementary material
Source: HighWire-hosted journal article supplement (https://bmjopen.bmj.com/content/12/9/e052872)
Supplement: inline-supplementary-material-1 [file inline-supplementary-material-1.pdf]

The search strategy for the metasynthesis:

To search the PsycINFO database, we used the following terms: *((qualitative adj2 (research\* or design\* or stud\* or method\*)) or hermeneutic\* or “grounded theory” or “meta synthes\*” or metasynthesis\* or metaethnograph\* or interview\* or phenomenolog\* or thematic or themes or experience\*).ti,ab,hw,id. or exp qualitative methods or phenomenology AND (caregiver\* or famil\* or next of kin\* or relatives or spous\* or wife or husband\* or sibling\* or sister\* or brother\* or dependent\* or loved one\* or parent\* or mother\* or father\* or carer\* or care giver\*).ti,ab,hw,id. AND glioma\*.ti,ab,hw,id. OR (brain adj2 (cancer or neoplasm\* or tumor\*).ti,ab,hw,id.*

In Medline and CHINAL, we used the following terms: *caregiver\* OR famil\* OR “next of kin\*” OR relatives OR spous\* OR wife OR husband\* OR sibling\* OR brother\* OR sister\* OR dependent\* OR “loved one\*” OR parent\* OR mother\* OR father\* OR carer\* OR “care giver\*” AND (MH “Qualitative Studies+”) OR (MH “Qualitative Research+”) OR (MH “Grounded Theory”) OR Interview\* OR experienc\* OR phenomenolog\* OR (qualitative WI (research\* OR method\* OR design\* OR stud\*)) OR themes OR thematic OR “audio recording” OR audiorecording OR metasynthes\* OR “meta synthes\*” OR metaetnograph\* AND (MH “Glioma+”) OR glioma OR gliomas OR glioblastom\* OR brain WI (cancer OR tumor\* or neoplasm\*).*
