# Supplementary material
Source: HighWire-hosted journal article supplement (https://bmjopen.bmj.com/content/12/9/e052872)
Supplement: inline-supplementary-material-2 [file inline-supplementary-material-2.pdf]

**Supplementary materials 2: Characteristics of the included studies.**

| <b>Author/year/country</b>                                 | <b>Focus</b>                                                                               | <b>Type of brain tumor and stage of treatment at interview</b>                             | <b>Recruitment</b>                                  | <b>Participants, sex, and relationship</b>                        | <b>Method/design</b>        | <b>Data collection/analysis</b>                                                                  |
|------------------------------------------------------------|--------------------------------------------------------------------------------------------|--------------------------------------------------------------------------------------------|-----------------------------------------------------|-------------------------------------------------------------------|-----------------------------|--------------------------------------------------------------------------------------------------|
| Arber et al. (2010). <sup>2</sup><br>United Kingdom (UK).  | Caregivers' need for information.                                                          | Malignant *<br>Stage of treatment not described.                                           | Specialist hospital in England.                     | N = 22<br>M: 7 and F: 15<br>17 spouses<br>3 children<br>2 parents | Grounded theory.            | Semistructured interview/comparative method for generating categories and topics.                |
| Arber et al. (2013). <sup>24</sup><br>United Kingdom (UK). | Caregivers' need for support.                                                              | Malignant *<br>Stage of treatment not described.                                           | Recruited by a nurse at a cancer center in England. | N = 22<br>M: 7 and F: 15<br>17 spouses<br>3 children<br>2 parents | Grounded theory.            | Semistructured interview/comparative method for generating categories and topics.                |
| Coolbrandt et al. (2015). <sup>23</sup> Belgium.           | Caregivers' experience and need for support.                                               | High-grade *<br>Radiation or chemotherapy, or in the follow-up phase after such treatment. | University Hospital in Leuven.                      | N = 16<br>M: 6 and F: 10<br>13 partners<br>2 parents<br>1 friend  | Grounded theory.            | Semistructured interview/thematic analysis inspired by the Qualitative Analysis Guide of Leuven. |
| Cutillo et al. (2018). <sup>30</sup><br>USA.               | Which strategies caregivers of children with a brain tumor use in the postoperative phase. | 15 benign.<br>25 malignant.<br>Newly diagnosed and newly operated.                         | Pediatric hospital in the USA.                      | N = 22<br>M: 3 and F: 19<br>All parents                           | Triangulating mixed-method. | Semistructured interview/thematic analysis.                                                      |

|                                                     |                                                                                                          |                                                                                                                                              |                                                                  |                                                                                                                           |                   |                                                                                                                                            |
|-----------------------------------------------------|----------------------------------------------------------------------------------------------------------|----------------------------------------------------------------------------------------------------------------------------------------------|------------------------------------------------------------------|---------------------------------------------------------------------------------------------------------------------------|-------------------|--------------------------------------------------------------------------------------------------------------------------------------------|
| Edvardson & Ahlström (2008) <sup>25</sup> . Sweden. | Caregivers' experience.                                                                                  | 25 low-grade.<br>2 high-grade.<br>Stage of treatment not described.                                                                          | The patients had participated in an earlier study.               | N = 28<br>M: 8 and F: 20<br>15 partners, living together<br>3 partners, living apart<br>8 parents<br>1 sibling<br>1 child | Not described.    | Semistructured interview/qualitative content analysis and quantitative analysis of how the topics were distributed among the participants. |
| Janda et al. (2006) <sup>22</sup> . Australia.      | The need of support for brain tumor patients and their caregivers.                                       | Different types *<br>Treatment phase not described, but time since diagnosis stated:<br>1–2 years: 22<br>5 years: 5<br>More than 5 years: 11 | Members of Queensland Cancer Fund's Brain Tumor Support Service. | N = 10 in focus group, n = 8 in semistructured interview<br>M: 4 and F: 18<br>13 partners<br>5 children                   | Qualitative.      | Focus group interview and semistructured interview/framework analysis.                                                                     |
| Lipsman et al. (2007) <sup>37</sup> . Canada.       | The experience of brain tumor patients and their caregivers, and how it affects the choice of treatment. | Malignant *<br>Palliative phase.                                                                                                             | Recruited by a neurosurgeon.                                     | N = 22<br>Further participant information not described                                                                   | Qualitative.      | Semistructured interview/thematic analysis.                                                                                                |
| Lou et al. (2015) <sup>34</sup> . Taiwan.           | The experience and suffering of mothers waiting for their child to die from brain tumor.                 | Malignant *<br>All patients deceased.                                                                                                        | Not described.                                                   | N = 10<br>F: 10<br>All mothers                                                                                            | Phenomenological. | In-depth interview/Colaizzi's analysis method.                                                                                             |

|                                                    |                                                                                                        |                                                                                                                                                                                            |                                        |                                                                                        |                               |                                                      |
|----------------------------------------------------|--------------------------------------------------------------------------------------------------------|--------------------------------------------------------------------------------------------------------------------------------------------------------------------------------------------|----------------------------------------|----------------------------------------------------------------------------------------|-------------------------------|------------------------------------------------------|
| Owensworth et al. (2015). <sup>35</sup> Australia. | Caregivers' experience of support.                                                                     | 6 low-grade.<br>5 high-grade.<br>All underwent surgery and radiation or chemotherapy.<br>9 months – 22 years since diagnosis.                                                              | Had participated in a different study. | N = 11<br>M: 6 and F: 5<br>8 spouses<br>3 parents                                      | Phenomenological.             | Semistructured interview/thematic analysis.          |
| Piil et al. (2015). <sup>21</sup> Denmark.         | Brain tumor patients' and their caregivers' experience, and their need for rehabilitation and support. | High-grade *<br>The interviews conducted after:<br>1. Surgical diagnosis<br>2. Oncological treatment<br>3,4. Oncological treatment and scan showing treatment effect<br>5. After treatment | The University Hospital in Copenhagen. | N = 33<br>M: 10 and F: 23<br>23 spouses<br>2 girl/boyfriends<br>7 children<br>1 sister | Longitudinal and exploratory. | Semistructured interview/thematic analysis.          |
| Russell et al. (2016) <sup>10</sup> . Canada.      | The experience of children with a brain tumor and their caregivers.                                    | Malignant *<br>Diagnosed at least 3 months previously, stage of treatment not described.                                                                                                   | Hospital in Toronto.                   | N = 12<br>Based on names:<br>F: 11 stk., 1 stk. unknown<br>All parents                 | Grounded theory.              | Semistructured interview/comparative analysis.       |
| Schmer et al. (2008) <sup>31</sup> . USA.          | Caregivers' experience concerning care tasks after chemotherapy.                                       | Malignant *<br>During first 6 months of treatment.                                                                                                                                         | The patients' treatment center.        | N = 10<br>Sex unknown<br>7 spouses<br>2 daughters<br>1 son-in-law                      | Phenomenological.             | Semistructured interview/Colaizzi's analysis method. |

|                                              |                                                                                    |                                                                                                                                         |                                     |                                                                                      |                                  |                                                               |
|----------------------------------------------|------------------------------------------------------------------------------------|-----------------------------------------------------------------------------------------------------------------------------------------|-------------------------------------|--------------------------------------------------------------------------------------|----------------------------------|---------------------------------------------------------------|
| Schubart et al. (2008). <sup>20</sup> USA.   | Caregivers' challenges and unmet needs.                                            | Different types of brain cancer *<br>6 deceased<br>2 exacerbations<br>2 unstable<br>10 stable<br>1 terminal<br>3 recurrent<br>1 unclear | NeuroOncology Center.               | N = 25<br>M: 7 and F: 18<br>18 spouses<br>4 parents<br>2 children<br>1 sibling       | Grounded theory.                 | Semistructured interview/open coding and cross-case analysis. |
| Sherwood et al. (2011). <sup>36</sup> USA.   | How caregivers adapt to their new role, and how this role changes during time.     | Malignant *<br>Interviewed 1 and 4 months after diagnosis.                                                                              | A regional hospital.                | N = 10<br>M: 2 and F: 8<br>5 spouses<br>2 parents<br>1 child<br>1 nephew<br>1 friend | Longitudinal descriptive design. | Semistructured interview/thematic content analysis.           |
| Shortman et al. (2013). United Kingdom (UK). | Mothers of children with brain tumor—their experience and their coping mechanisms. | Different types and degrees *.<br>All underwent surgery, five radiation, and four chemotherapy.<br>17–35 months since diagnosis.        | Also participated in another study. | N = 6<br>F: 6<br>All mothers.                                                        | Not described.                   | Semistructured interview/thematic content analysis.           |

|                                               |                                                                                                                             |                                                                                                                                                                                          |                                                         |                                                                             |                                    |                                                                                                |
|-----------------------------------------------|-----------------------------------------------------------------------------------------------------------------------------|------------------------------------------------------------------------------------------------------------------------------------------------------------------------------------------|---------------------------------------------------------|-----------------------------------------------------------------------------|------------------------------------|------------------------------------------------------------------------------------------------|
| Strang & Strang (2001). <sup>28</sup> Sweden. | The degree to which patients with a brain tumor and their caregivers cope, understand, and create meaning in the situation. | Malignant tumors, grade 2–4.<br>Treatment stage not described.                                                                                                                           | Not described.                                          | N = 16<br>Further participant information not described.                    | Hermeneutic phenomenological.      | Semistructured interview/structural analysis based on hermeneutic circle described by Ricoeur. |
| Tastan et al. (2011). <sup>32</sup> Turkey.   | Caregivers' experience of postoperative phase and homecare.                                                                 | Different types and degrees *<br>All patients had undergone surgery and postoperative treatment and were being treated at home.                                                          | A research and military training hospital in Turkey.    | N = 19<br>M: 4 and F: 6<br>4 spouses<br>4 children<br>1 parent<br>1 sibling | Descriptive qualitative study.     | Semistructured interview/Colaizzi's analysis method.                                           |
| Huang et al. (2021). <sup>27</sup> Taiwan     | The lived experience of parents having a child with a brain tumor during the shared decision-making process of treatment    | 4 medulloblastoma<br>3 germ cell tumor<br>1 glioblastoma<br>1 astrocytoma<br>1 ependymoma<br><br>The interviews were conducted between 1-6 months after the child received the diagnosis | A pediatric oncology ward at a medical center in Taiwan | N=10<br>M: 3 and F: 7                                                       | Descriptive phenomenological study | Semistructured interview/Colaizzi's analysis method.                                           |
| Wideheim et al. (2002). <sup>26</sup> Sweden. | The experience of a brain tumor from a family perspective.                                                                  | High-grade glioma.<br>The interviews were conducted 2–3 weeks, 3 months, and 6 months postoperatively.                                                                                   | Not described.                                          | N = 5<br>Sex unknown<br>2 spouses<br>2 parents                              | Descriptive qualitative study.     | Qualitative interviews/inductive content analysis.                                             |

|                                             |                                                                                |                                       |                                                     |                                         |             |                                                     |
|---------------------------------------------|--------------------------------------------------------------------------------|---------------------------------------|-----------------------------------------------------|-----------------------------------------|-------------|-----------------------------------------------------|
|                                             |                                                                                |                                       |                                                     | 1 adult child                           |             |                                                     |
| Zelcer et al. (2010). <sup>33</sup> Canada. | The experience of brain tumor patients and caregivers in the palliative phase. | Malignant *<br>All patients deceased. | Children's Hospital, London Health Sciences Centre. | N = 25<br>M: 9 and F: 16<br>All parents | Qualitative | Semistructured interview/thematic content analysis. |

1 M = Male, F = Female

\*=Tumor not further described
